# Supplementary material
Source: ML conference proceedings conference paper supplement (https://openreview.net/forum?id=DERtzUdhkk)
Supplement: supplementary_material [file attachment]

---

# Supplementary Material: TorchSpatial-A Location Encoding Framework and Benchmark for Spatial Representation Learning

---

Nemin Wu<sup>1\*</sup>, Qian Cao<sup>1\*</sup>, Zhangyu Wang<sup>2</sup>, Zeping Liu<sup>3</sup>, Yanlin Qi<sup>4</sup>,  
Jielu Zhang<sup>1</sup>, Joshua Ni<sup>5</sup>, Xiaobai Yao<sup>1</sup>, Hongxu Ma<sup>6</sup>, Lan Mu<sup>1</sup>,  
Stefano Ermon<sup>7</sup>, Tanuja Ganu<sup>8</sup>, Akshay Nambi<sup>8</sup>, Ni Lao<sup>6†</sup>, Gengchen Mai<sup>3,1†</sup>

<sup>1</sup>University of Georgia, <sup>2</sup>UC Santa Barbara, <sup>3</sup>University of Texas at Austin,

<sup>4</sup>UC Davis, <sup>5</sup>Basis Independent Fremont, <sup>6</sup>Google LLC,

<sup>7</sup>Stanford University, <sup>8</sup>Microsoft Research,

{nemin.wu, qian.cao1, jielu.zhang, xyao, mulan}@uga.edu,  
zhangyuwang@ucsb.edu, zeping.liu@utexas.edu, ylqi@ucdavis.edu,  
nijoshua2025@gmail.com, {hxma, nlao}@google.com, ermon@cs.stanford.edu,  
{tanuja.ganu, akshay.nambi}@microsoft.com, gengchen.mai@austin.utexas.edu

\*Equal contribution. Author ordering is determined by coin flip. †Corresponding author.

## 1 Motivation

**For what purpose was the dataset created? Was there a specific task in mind? Was there a specific gap that needed to be filled? Please provide a description.**

In order to systematically compare the location encoders' performance and their impact on the model's overall geographic bias on datasets with various set setups, sizes, and geographic coverages, we clean and preprocess 7 geo-aware image classification datasets and 10 geo-aware image regression datasets.

**Geo-Aware Image Classification.** The geo-aware image classification task aims to classify a given image (e.g., species images, ground-level images, satellite images, etc.) into its correct category based on the image itself and its associated location metadata. Figure 1 in our paper illustrates how location encoders from TorchSpatial can be used to solve this task. Please refer to Appendix Section 2 for a description of the model setup of the geo-aware image classification task.

**Geo-Aware Image Regression.** The geo-aware image regression task has a similar task setup as the classification task. The difference is the image target label is a continuous value that represents population density, forest coverage percentage, elevation, nightlight luminosity, asset wealth index, child mortality rate, women BMI, women educational attainment, clean water index, and sanitation index at the given location.

**Who created the dataset (e.g., which team, research group) and on behalf of which entity (e.g., company, institution, organization)?**

Spatially Explicit Artificial Intelligence Lab from the University of Georgia & University of Texas at Austin created the dataset.

**Who funded the creation of the dataset? If there is an associated grant, please provide the name of the grantor and the grant name and number.**

This work was supported by funds from the University of Georgia IIPA Seed Grant and UGA Presidential Interdisciplinary Seed Grant. Dr. Gengchen Mai acknowledges the Microsoft Research Accelerate Foundation Models Academic Research (AFMR) Initiative for their support.

27 **Any other comments?**

28 None.

## 29 **2 Composition**

30 **What do the instances that comprise the dataset represent (e.g., documents, photos, people, countries)?** Are there multiple types of instances (e.g., movies, users, and ratings; people and interactions between them; nodes and edges)? Please provide a description.

33 The instances in all 17 datasets represent images. We provide pretrained image embeddings as well as the associated geolocations for all tasks. For the image classification tasks, the labels are the class IDs, while for the regression tasks, the labels represent the predicted regression values.

36 **How many instances are there in total (of each type, if appropriate)?**

37 The number of instances for each dataset is listed in Table 1

Table 1: Dataset Information

| Task Category        | Dataset               | Instances |
|----------------------|-----------------------|-----------|
| Image Classification | BirdSnap              | 19576     |
|                      | BirdSnap†             | 43470     |
|                      | NABirds†              | 23699     |
|                      | iNat2017              | 675170    |
|                      | iNat2018              | 461939    |
|                      | YFCC                  | 36146     |
|                      | fMoW                  | 416612    |
| Image Regression     | Population Density    | 425637    |
|                      | Forest Cover          | 498106    |
|                      | Nightlight Luminosity | 492226    |
|                      | Elevation             | 498115    |
|                      | Asset Index           | 89936     |
|                      | Women BMI             | 94866     |
|                      | Water Index           | 86938     |
|                      | Child Mortality Rate  | 105582    |
|                      | Sanitation Index      | 89271     |
|                      | Women Edu             | 117062    |

38 **Does the dataset contain all possible instances or is it a sample (not necessarily random) of instances from a larger set?** If the dataset is a sample, then what is the larger set? Is the sample representative of the larger set (e.g., geographic coverage)? If so, please describe how this representativeness was validated/verified. If it is not representative of the larger set, please describe why not (e.g., to cover a more diverse range of instances, because instances were withheld or unavailable).

44 The 7 datasets for image classification and 6 datasets from SustainBench are not samples of instances from a larger set but represent the whole datasets. We performed preprocessing and cleaning on the four datasets for image regression from the dataset MOSAIKS. The process can be seen in the "Collection Process" below. We plot the geographic distribution of these four datasets (see Appendix Figure 5, and it shows that they are uniformly distributed, just like the original MOSAIKS.

49 **What data does each instance consist of?** "Raw" data (e.g., unprocessed text or images) or features? In either case, please provide a description.

51 We provide image features with geographic coordinates and labels (species, object categories, land use types, population density, forest cover ratio, nightlight luminosity, elevation, asset wealth index, child mortality rate, women BMI, women educational attainment, clean water index, and sanitation index).

55 **Is there a label or target associated with each instance?** If so, please provide a description.

56 The labels represent species, object categories, and land use types for classification tasks. For  
57 regression tasks, the labels are continuous values representing population density, forest cover  
58 ratio, nightlight luminosity, elevation, asset wealth index, child mortality rate, women BMI, women  
59 educational attainment, clean water index, and sanitation index as described above.

60 **Is any information missing from individual instances?** If so, please provide a description, ex-  
61 plaining why this information is missing (e.g., because it was unavailable). This does not include  
62 intentionally removed information, but might include, e.g., redacted text.

63 Some coordinates are missing in the **BirdSnap**, **BirdSnap†**, **NABirds†**, **iNat2017**, and **iNat2018**  
64 datasets, and these coordinates are not available in their original sources. Despite this, we did not  
65 exclude these instances when evaluating the location encoders. This decision was made to fairly  
66 assess the performance of the encoders in real-world scenarios, where spatial information may be  
67 incomplete or unavailable sometimes. Including these instances in the evaluation can help evaluate  
68 the robustness and generalizability of the location encoders, ensuring they can effectively handle  
69 situations where not all instances are guaranteed to have complete spatial information.

70 **Are relationships between individual instances made explicit (e.g., users’ movie ratings, social  
71 network links)?** If so, please describe how these relationships are made explicit.

72 Instances have geographic relationships with each other, which can be reflected in their coordinates.  
73 Otherwise, there are no explicit relations among different instances.

74 **Are there recommended data splits (e.g., training, development/validation, testing)?** If so, please  
75 provide a description of these splits, explaining the rationale behind them.

76 The datasets for image classification were already divided by their original sources. For the regression  
77 tasks, we performed an 8:2 random split on the datasets to form the training and testing datasets.

78 **Are there any errors, sources of noise, or redundancies in the dataset?** If so, please provide a  
79 description.

80 The geolocations of each species’ images in **BirdSnap**, **BirdSnap†**, **NABirds†**, **iNat2017**, **iNat2018**,  
81 and **SustainBench** datasets might contain noise. The location metadata of each image includes a  
82 location uncertainty measure. Coordinates in **SustainBench** may have been randomly “offset” by up  
83 to 2 km in urban areas and 10 km in rural areas to safeguard the privacy of survey participants.

84 **Is the dataset self-contained, or does it link to or otherwise rely on external resources (e.g.,  
85 websites, tweets, other datasets)?** If it links to or relies on external resources, a) are there guarantees  
86 that they will exist, and remain constant, over time; b) are there official archival versions of the  
87 complete dataset (i.e., including the external resources as they existed at the time the dataset was  
88 created); c) are there any restrictions (e.g., licenses, fees) associated with any of the external resources  
89 that might apply to a dataset consumer? Please provide descriptions of all external resources and any  
90 restrictions associated with them, as well as links or other access points, as appropriate.

91 The dataset is entirely self-contained.

92 **Does the dataset contain data that might be considered confidential (e.g., data that is pro-  
93 tected by legal privilege or by doctor–patient confidentiality, data that includes the content of  
94 individuals’ nonpublic communications)?** If so, please provide a description.

95 The 17 datasets contained in LocBench are open-sourced datasets that do not contain confidential  
96 information.

97 **Does the dataset contain data that, if viewed directly, might be offensive, insulting, threatening,  
98 or might otherwise cause anxiety?** If so, please describe why.

99 No, the dataset does not contain data that, if viewed directly, might be offensive, insulting, threatening,  
100 or might otherwise cause anxiety. The dataset is composed of images and labels related to natural  
101 elements and general socio-economic information. It does not include content that could be considered  
102 sensitive or inappropriate.

103 **Does the dataset identify any subpopulations (e.g., by age, gender)?** If so, please describe how  
104 these subpopulations are identified and provide a description of their respective distributions within  
105 the dataset.

106 No, the dataset is homogeneous in terms of these demographic factors, and all instances are considered  
107 as part of a single population without further differentiation.

108 **Is it possible to identify individuals (i.e., one or more natural persons), either directly or**  
109 **indirectly (i.e., in combination with other data) from the dataset?** If so, please describe how.

110 In the **BirdSnap**, **BirdSnap†**, **NABirds†**, **iNat2017**, and **iNat2018** datasets, the image metadata  
111 contains "user ID" which indicates who took the corresponding photo. While previous work [6] uses  
112 the user ID to generate user embeddings aiming at further improving the model performance, we do  
113 not consider them in the TorchSpatial since the focus of TorchSpatial is supporting the development  
114 and evaluation of location encoders.

115 **Does the dataset contain data that might be considered sensitive in any way (e.g., data that**  
116 **reveals race or ethnic origins, sexual orientations, religious beliefs, political opinions or union**  
117 **memberships, or locations; financial or health data; biometric or genetic data; forms of**  
118 **government identification, such as social security numbers; criminal history)?** If so, please  
119 **provide a description.**

120 No. There are no personal sensitive data contained in LocBench.

121 **Any other comments?**

122 None.

### 123 **3 Collection Process**

124 **How was the data associated with each instance acquired?** Was the data directly observable (e.g.,  
125 raw text, movie ratings), reported by subjects (e.g., survey responses), or indirectly inferred/derived  
126 from other data (e.g., part-of-speech tags, model-based guesses for age or language)? If the data was  
127 reported by subjects or indirectly inferred/derived from other data, was the data validated/verified? If  
128 so, please describe how.

129 **BirdSnap**, **BirdSnap†**, and **NABirds†** were geographically annotated by [6] based on location  
130 simulation from the eBrid dataset[12], while their species labels are from the original BirdSnap[1]  
131 and NABirds[14]. For **iNat2017** and **iNat2018**, their species labels are also from the original  
132 iNaturalist 2017[15] and iNaturalist 2018 challenges [15], but the location annotations were provided  
133 by iNaturalist 2021[5]. **YFCC** was manually verified and annotated by [13] from a large set of the  
134 Yahoo Flickr Creative Commons 100M dataset [16], which was initially noisily tagged by Flickr  
135 users. **fMoW** was annotated by 642 GeoHIVE users according to [2]. In terms of four datasets for  
136 image regression from the **MOSAICS**. Tree cover ratio, elevation, and nightlight luminosity were  
137 observed by satellite and estimated by researchers[4, 3, 10], while population density is from Gridded  
138 Population of the World (GPW) dataset v4<sup>1</sup>. For six **SustainBench** datasets, labels were derived  
139 from the Demographic and Health Surveys (DHS), which were originally household-level and were  
140 aggregated to community-level by [17].

141 **What mechanisms or procedures were used to collect the data (e.g., hardware apparatuses**  
142 **or sensors, manual human curation, software programs, software APIs)?** How were these  
143 **mechanisms or procedures validated?**

144 The species recognition datasets including **BirdSnap**, **BirdSnap†**, **NABirds†**, **iNat2017**, and  
145 **iNat2018** datasets are collected based on citizen science platforms. The **YFCC** dataset was con-  
146 structed by using Flickr API. The **fMoW** dataset was originally constructed by [2] based on multiple  
147 satellite sensors and annotated by 642 GeoHIVE users. The four **MOSAICS** datasets were originally  
148 collected by [11] based on collocated satellite images from Google Static Maps API, nightlight  
149 images from the Visible Infrared Imaging Radiometer Suite (VIIRS)<sup>2</sup>, population data from GPW  
150 v4, tree cover data from [4], and elevation provided by Mapzen and accessed via the Amazon Web  
151 Services (AWS) Terrain Tile service. The six **SustainBench** datasets were originally collected by  
152 [17], whose images were from Landsat 5/7/8 satellites, the DMSP and VIIRS satellites, and labels  
153 were from the Demographic and Health Surveys (DHS) program.

---

<sup>1</sup>These data can be accessed at <https://sedac.ciesin.columbia.edu/data/collection/gpw-v4>.

<sup>2</sup>These data can be accessed at <https://eogdata.mines.edu/products/vn1/>.

154 **If the dataset is a sample from a larger set, what was the sampling strategy (e.g., deterministic,**  
155 **probabilistic with specific sampling probabilities)?**

156 All datasets included in the paper are not samples from larger sets.

157 **Who was involved in the data collection process (e.g., students, crowdworkers, contractors) and**  
158 **how were they compensated (e.g., how much were crowdworkers paid)?**

159 LocBench are constructed by preprocessing and cleaning multiple existing datasets by authors. There  
160 are no other people involved in this process.

161 **Over what timeframe was the data collected? Does this timeframe match the creation timeframe of**  
162 **the data associated with the instances (e.g., recent crawl of old news articles)? If not, please describe**  
163 **the timeframe in which the data associated with the instances was created.**

164 **BirdSnap** and **BirdSnap†** are derived from the BirdSnap, a dataset of bird images collected from  
165 the internet. The exact timeframe for data collection is not specified, but we can reasonably assume  
166 they were collected before the dataset's release year in 2014. **NABirds†**'s train locations and images  
167 are sampled from eBird 2015, and the test set is from 2016. **iNat2017** and **iNat2018** are part of  
168 the iNaturalist project, which crowdsources observations of biodiversity. The data in **iNat2017** and  
169 **iNat2018** were collected, annotated, cleaned, and released during the respective years (2017 and  
170 2018). **YFCC** is a subset of YFCC100M, which contains images from Flickr in 2004 until early  
171 2014. The location annotation was conducted by [13], so it was annotated before the publishing year  
172 2015. **fMoW** contains remote sensing images from 2002 to 2017 and the distribution over the years  
173 is illustrated in [2]. The dataset was released in 2018. The **Forest Cover** is measured from data in  
174 2010. The **Population Density** is originally from the GPW v4, which collected data between 2005  
175 and 2014. In addition, population density in the US is from the 2010 census. **Nightlight Luminosity**  
176 derives from the 2015 annual composite of VIIRS. **Elevation** is composed of data roughly from 2010  
177 to 2017. **SustainBench** contains nighttime remote sensing images from two sources: DMSP taken  
178 in 2011 or earlier, and VIIRS taken in 2012 or after. The socioeconomic indices were originally  
179 collected from 1996 to 2018.

180 **Were any ethical review processes conducted (e.g., by an institutional review board)? If so,**  
181 **please provide a description of these review processes, including the outcomes, as well as a link or**  
182 **other access point to any supporting documentation.**

183 No. Since LocBench is constructed based on multiple existing open-sourced datasets, we do not  
184 conduct an ethical review.

185 **Did you collect the data from the individuals in question directly, or obtain it via third parties**  
186 **or other sources (e.g., websites)?**

187 No. As described above, the data was collected from other open-sourced datasets.

188 **Were the individuals in question notified about the data collection? If so, please describe (or**  
189 **show with screenshots or other information) how notice was provided, and provide a link or other**  
190 **access point to, or otherwise reproduce, the exact language of the notification itself.**

191 N/A.

192 **Did the individuals in question consent to the collection and use of their data? If so, please**  
193 **describe (or show with screenshots or other information) how consent was requested and provided,**  
194 **and provide a link or other access point to, or otherwise reproduce, the exact language to which the**  
195 **individuals consented.**

196 N/A.

197 **If consent was obtained, were the consenting individuals provided with a mechanism to revoke**  
198 **their consent in the future or for certain uses? If so, please provide a description, as well as a link**  
199 **or other access point to the mechanism (if appropriate).**

200 N/A.

201 **Has an analysis of the potential impact of the dataset and its use on data subjects (e.g., a data**  
202 **protection impact analysis) been conducted? If so, please provide a description of this analysis,**  
203 **including the outcomes, as well as a link or other access point to any supporting documentation.**

204 N/A.

205 **Any other comments?**

206 None.

## 207 4 Preprocessing/cleaning/labeling

208 **Was any preprocessing/cleaning/labeling of the data done (e.g., discretization or bucketing,**  
209 **tokenization, part-of-speech tagging, SIFT feature extraction, removal of instances, processing**  
210 **of missing values)?** If so, please provide a description. If not, you may skip the remaining questions  
211 **in this section.**

212 We deleted the instances with missing values in the four image regression datasets from MOSAIKS  
213 [11]. We split these four datasets into training and testing sets with a ratio of 8:2. In addition, we  
214 also did log transformation for forest cover ratio, population density, and nightlight luminosity, as  
215 described above.

216 For both image classification and image regression datasets, we extract the image embedding of  
217 each image and directly feed them to the neural network instead of the raw images by following the  
218 practice of [6, 7, 9]. By doing that, we can speed up the location encoder training process and allow  
219 us to focus more on location encoder model development.

220 **Was the “raw” data saved in addition to the preprocessed/cleaned/labeled data (e.g., to support**  
221 **unanticipated future uses)?** If so, please provide a link or other access point to the “raw” data.

222 In the dataset, we exclusively provide the pre-trained image embeddings to standardize the pre-trained  
223 settings across all location encoders. Additionally, comprehensive guidance to the original data  
224 sources is available on the TorchSpatial documentation at [https://torchspatial.readthedocs.](https://torchspatial.readthedocs.io/en/latest/)  
225 [io/en/latest/](https://torchspatial.readthedocs.io/en/latest/).

226 **Is the software that was used to preprocess/clean/label the data available?** If so, please provide a  
227 **link or other access point.**

228 No, we did not utilize any software for data preprocessing, cleaning, or labeling. The codes for data  
229 preprocessing and the split of the regression dataset can be found under the “pre\_process” folder  
230 on GitHub at <https://github.com/seai-lab/TorchSpatial>.

231 **Any other comments?**

232 None.

## 233 5 Uses

234 **Has the dataset been used for any tasks already?** If so, please provide a description.

235 **BirdSnap**, **BirdSnap†**, **NABirds†**, **iNat2017**, and **iNat2018** have been used for geo-aware fine-  
236 grained species recognition [9]. **YFCC** has been used for Flickr image classification [6, 9], and  
237 **fMoW** for remote sensing image classification [9, 8]. **Population Density**, **Forest Cover**, **Nightlight**  
238 **Luminosity**, **Elevation**, **Asset Wealth Index**, **Child Mortality Rate**, **Women BMI**, **Women Edu**,  
239 **Water Index**, and **Sanitation Index** have been employed for image regression tasks. All 17 datasets  
240 are constructed and used for geo-aware tasks.

241 **Is there a repository that links to any or all papers or systems that use the dataset?** If so, please  
242 **provide a link or other access point.**

243 Please refer to our GitHub repository <https://github.com/seai-lab/TorchSpatial>.

244 **What (other) tasks could the dataset be used for?**

245 Other than using the datasets in LocBench to train location encoders in a supervised learning manner,  
246 we can also use all 17 datasets in LocBench for location encoder unsupervised pre-training and then  
247 adapt the model for other geo-aware tasks such as spatial interpolation, precipitation prediction, etc.

248 **Is there anything about the composition of the dataset or the way it was collected and prepro-**  
249 **cessed/cleaned/labeled that might impact future uses?** For example, is there anything that a dataset



250 consumer might need to know to avoid uses that could result in unfair treatment of individuals or  
251 groups (e.g., stereotyping, quality of service issues) or other risks or harms (e.g., legal risks, financial  
252 harms)? If so, please provide a description. Is there anything a dataset consumer could do to mitigate  
253 these risks or harms?

254 The datasets might be geo-biased, and inappropriate usage could enhance this bias. For example,  
255 although **iNat2017**, **iNat2018**, and **fMoW** contain images from all over the world, images are  
256 unevenly distributed: Asia, Africa, and South America are less represented.

257 **Are there tasks for which the dataset should not be used?** If so, please provide a description.

258 The datasets contained in LocBench are constructed to support the development of location encoders.  
259 They should not be used to predict sensitive indices of places such as average attractiveness, likeability,  
260 or intelligence of residents of specific places.

261 **Any other comments?**

262 None.

## 263 **6 Distribution**

264 **Will the dataset be distributed to third parties outside of the entity (e.g., company, institution,  
265 organization) on behalf of which the dataset was created?** If so, please provide a description.

266 Yes, the dataset is publicly available on the internet through this permanent figshare repository  
267 (<https://doi.org/10.6084/m9.figshare.26026798>) as well as this Dropbox link  
268 ([https://www.dropbox.com/scl/fo/lsvb50zszhup2hylphdxc/AF84XwmulxVnLYJoouq\\_i\\_](https://www.dropbox.com/scl/fo/lsvb50zszhup2hylphdxc/AF84XwmulxVnLYJoouq_i_Q?rlkey=tc53scmvc48di52z1k9azzymk&st=ijkms1i1&dl=0)  
269 [Q?rlkey=tc53scmvc48di52z1k9azzymk&st=ijkms1i1&dl=0](https://www.dropbox.com/scl/fo/lsvb50zszhup2hylphdxc/AF84XwmulxVnLYJoouq_i_Q?rlkey=tc53scmvc48di52z1k9azzymk&st=ijkms1i1&dl=0)).

270 **How will the dataset will be distributed (e.g., tarball on website, API, GitHub)? Does the dataset  
271 have a digital object identifier (DOI)?**

272 The dataset is distributed at figshare and the DOI of the dataset is [https://doi.org/](https://doi.org/10.6084/m9.figshare.26026798)  
273 [10.6084/m9.figshare.26026798](https://doi.org/10.6084/m9.figshare.26026798). The dataset can also be downloaded from Dropbox  
274 ([https://www.dropbox.com/scl/fo/lsvb50zszhup2hylphdxc/AF84XwmulxVnLYJoouq\\_i\\_](https://www.dropbox.com/scl/fo/lsvb50zszhup2hylphdxc/AF84XwmulxVnLYJoouq_i_Q?rlkey=tc53scmvc48di52z1k9azzymk&st=ijkms1i1&dl=0)  
275 [Q?rlkey=tc53scmvc48di52z1k9azzymk&st=ijkms1i1&dl=0](https://www.dropbox.com/scl/fo/lsvb50zszhup2hylphdxc/AF84XwmulxVnLYJoouq_i_Q?rlkey=tc53scmvc48di52z1k9azzymk&st=ijkms1i1&dl=0)).

276 **When will the dataset be distributed?**

277 The dataset was first released in June 2024.

278 **Will the dataset be distributed under a copyright or other intellectual property (IP) license,  
279 and/or under applicable terms of use (ToU)?** If so, please describe this license and/or ToU, and  
280 provide a link or other access point to, or otherwise reproduce, any relevant licensing terms or ToU,  
281 as well as any fees associated with these restrictions.

282 All data products created through our work that are not covered under upstream licensing  
283 agreements are available via a CC BY-NC 4.0 license. To view a copy of this license, visit  
284 <http://creativecommons.org/licenses/by/4.0/>. All upstream data use restrictions take precedence  
285 over this license.

286 **Have any third parties imposed IP-based or other restrictions on the data associated with  
287 the instances?** If so, please describe these restrictions, and provide a link or other access point  
288 to, or otherwise reproduce, any relevant licensing terms, as well as any fees associated with these  
289 restrictions.

290 No.

291 **Do any export controls or other regulatory restrictions apply to the dataset or to individual  
292 instances?** If so, please describe these restrictions, and provide a link or other access point to, or  
293 otherwise reproduce, any supporting documentation.

294 No.

295 **Any other comments?**

296 None

297 **7 Maintenance**

298 **Who will be supporting/hosting/maintaining the dataset?**

299 The Spatially Explicit Artificial Intelligence Lab, led by Dr. Gengchen Mai, is responsible for  
300 supporting and maintaining the dataset.

301 **How can the owner/curator/manager of the dataset be contacted (e.g., email address)?**

302 The managers of the dataset, Nemin Wu, Qian Cao, and Gengchen Mai, can be contacted at  
303 `nemin.wu@uga.edu`, `qian.cao1@uga.edu`, and `gengchen.mai@austin.utexas.edu`.

304 **Is there an erratum? If so, please provide a link or other access point.**

305 No, it is the first release. Updates would be listed on the TorchSpatial web page (<https://github.com/seai-lab/TorchSpatial>).

307 **Will the dataset be updated (e.g., to correct labeling errors, add new instances, delete instances)?**

308 If so, please describe how often, by whom, and how updates will be communicated to dataset  
309 consumers (e.g., mailing list, GitHub)?

310 This will be posted on the TorchSpatial web page (<https://github.com/seai-lab/TorchSpatial>).

312 **If the dataset relates to people, are there applicable limits on the retention of the data associated  
313 with the instances (e.g., were the individuals in question told that their data would be retained  
314 for a fixed period of time and then deleted)?** If so, please describe these limits and explain how  
315 they will be enforced.

316 N/A.

317 **Will older versions of the dataset continue to be supported/hosted/maintained?** If so, please  
318 describe how. If not, please describe how its obsolescence will be communicated to dataset consumers.

319 Older versions will be kept around for consistency. Details will be posted on the TorchSpatial web  
320 page (<https://github.com/seai-lab/TorchSpatial>).

321 **If others want to extend/augment/build on/contribute to the dataset, is there a mechanism for  
322 them to do so?** If so, please provide a description. Will these contributions be validated/verified? If  
323 so, please describe how. If not, why not? Is there a process for communicating/distributing these  
324 contributions to dataset consumers? If so, please provide a description.

325 Contributions from others who wish to extend, augment, or build on the dataset are welcomed.  
326 Interested contributors are encouraged to contact the corresponding author, Dr. Gengchen Mai, at  
327 `gengchen.mai@austin.utexas.edu` to discuss incorporating fixes and extensions. Contributions  
328 will be reviewed and validated by the original authors to ensure they meet the dataset's quality  
329 standards. Once validated, these contributions will be communicated and distributed to dataset  
330 consumers through existing sources. They will be distributed via the existing links and sources.

331 **Any other comments?**

332 None.

333 **8 Machine Learning Reproducibility Checklist**

334 We adopt the Machine Learning Reproducibility Checklist v2.0, released on Apr.7 2020, and exclude  
335 the contents for models, algorithms, and theoretical claim because they are not applicable for this  
336 project.

337 **For all datasets used, check if you include:**

338 ✓ **The relevant statistics, such as a number of examples.**

339 Yes. The number of examples can be seen in Table 1

340 ✓ **The details of train / validation / test splits. An explanation of any data that were excluded,  
341 and all pre-processing steps.**

342 Yes. We explain this information in Section 4.



- 343 ✓ A link to a downloadable version of the dataset or simulation environment.  
344 Yes. Users can access the datasets via figshare (<https://doi.org/10.6084/m9.figshare.26026798>) and Dropbox ([https://www.dropbox.com/scl/fo/lsvb50zszhup2hylphdxc/AF84XwmulxVnLYJoouq\\_i\\_Q?rlkey=tc53scmvc48di52z1k9azzymk&st=ijkms1i1&dl=0](https://www.dropbox.com/scl/fo/lsvb50zszhup2hylphdxc/AF84XwmulxVnLYJoouq_i_Q?rlkey=tc53scmvc48di52z1k9azzymk&st=ijkms1i1&dl=0)).  
345  
346  
347  
348 □ For new data collected, a complete description of the data collection process, such as  
349 instructions to annotators and methods for quality control.  
350 Not applicable.

351 **For all shared code related to this work, check if you include:**

- 352 ✓ Specification of dependencies.  
353 Yes. See the TorchSpatial web page (<https://github.com/seai-lab/TorchSpatial>).  
354 ✓ Training code.  
355 Yes. Same as above.  
356 ✓ Evaluation code.  
357 Yes. Same as above.  
358 ✓ (Pre-)trained model(s).  
359 Yes. Same as above.  
360 ✓ README file includes table of results accompanied by precise command to run to produce  
361 those results.  
362 Yes. The tables of results are shown in README file, but the corresponding commands  
363 are in bash shell files. All of them can be found on our TorchSpatial web page (<https://github.com/seai-lab/TorchSpatial>).  
364

365 **For all reported experimental results, check if you include:**

- 366 ✓ The range of hyper-parameters considered, method to select the best hyper-parameter  
367 configuration, and specification of all hyper-parameters used to generate results.  
368 Yes. See Appendix Section 5.  
369 ✓ The exact number of training and evaluation runs.  
370 Yes. See README file on our TorchSpatial web page (<https://github.com/seai-lab/TorchSpatial>).  
371  
372 ✓ A clear definition of the specific measure or statistics used to report results.  
373 Yes. See paper Section 3.3 and Appendix Section 4.  
374 ✗ A description of results with central tendency (e.g. mean) and variation (e.g. error bars).  
375 We provide experimental results of 15 location encoders on all datasets contained in  
376 LocBench. Reporting central tendency and variation for all of them is prohibitively expen-  
377 sive. We will provide them in the future through our website.  
378 ✓ The average runtime for each result, or estimated energy cost.  
379 Yes. See README file on our TorchSpatial web page (<https://github.com/seai-lab/TorchSpatial>).  
380  
381 ✓ A description of the computing infrastructure used.  
382 Yes. See Appendix Section 5.

383 **References**

- 384 [1] Thomas Berg, Jiongxin Liu, Seung Woo Lee, Michelle L Alexander, David W Jacobs, and  
385 Peter N Belhumeur. Birdsnap: Large-scale fine-grained visual categorization of birds. In  
386 *Proceedings of the IEEE conference on computer vision and pattern recognition*, pages 2011–  
387 2018, 2014.

- 388 [2] Gordon Christie, Neil Fendley, James Wilson, and Ryan Mukherjee. Functional map of the  
389 world. In *Proceedings of the IEEE Conference on Computer Vision and Pattern Recognition*,  
390 pages 6172–6180, 2018.
- 391 [3] Tom G Farr, Paul A Rosen, Edward Caro, Robert Crippen, Riley Duren, Scott Hensley, Michael  
392 Kobrick, Mimi Paller, Ernesto Rodriguez, Ladislav Roth, et al. The shuttle radar topography  
393 mission. *Reviews of geophysics*, 45(2), 2007.
- 394 [4] Matthew C Hansen, Peter V Potapov, Rebecca Moore, Matt Hancher, Svetlana A Turubanova,  
395 Alexandra Tyukavina, David Thau, Stephen V Stehman, Scott J Goetz, Thomas R Loveland, et al.  
396 High-resolution global maps of 21st-century forest cover change. *science*, 342(6160):850–853,  
397 2013.
- 398 [5] iNaturalist 2021 competition dataset. [https://github.com/visipedia/inat\\_comp/  
399 tree/master/2021](https://github.com/visipedia/inat_comp/tree/master/2021), 2021.
- 400 [6] Oisin Mac Aodha, Elijah Cole, and Pietro Perona. Presence-only geographical priors for  
401 fine-grained image classification. In *Proceedings of the IEEE/CVF International Conference on  
402 Computer Vision*, pages 9596–9606, 2019.
- 403 [7] Gengchen Mai, Krzysztof Janowicz, Bo Yan, Rui Zhu, Ling Cai, and Ni Lao. Multi-  
404 scale representation learning for spatial feature distributions using grid cells. *arXiv preprint  
405 arXiv:2003.00824*, 2020.
- 406 [8] Gengchen Mai, Ni Lao, Yutong He, Jiaming Song, and Stefano Ermon. Csp: Self-supervised  
407 contrastive spatial pre-training for geospatial-visual representations. In *International Conference  
408 on Machine Learning*, pages 23498–23515. PMLR, 2023.
- 409 [9] Gengchen Mai, Yao Xuan, Wenyun Zuo, Yutong He, Jiaming Song, Stefano Ermon, Krzysztof  
410 Janowicz, and Ni Lao. Sphere2vec: A general-purpose location representation learning over a  
411 spherical surface for large-scale geospatial predictions. *ISPRS Journal of Photogrammetry and  
412 Remote Sensing*, 202:439–462, 2023.
- 413 [10] RE Murphy, Phillip Ardanuy, Frank J Deluccia, JE Clement, and Carl F Schueler. The visible  
414 infrared imaging radiometer suite. In *Earth Science Satellite Remote Sensing: Vol. 1: Science  
415 and Instruments*, pages 199–223. Springer, 2006.
- 416 [11] Esther Rolf, Jonathan Proctor, Tamma Carleton, Ian Bolliger, Vaishaal Shankar, Miyabi Ishihara,  
417 Benjamin Recht, and Solomon Hsiang. A generalizable and accessible approach to machine  
418 learning with global satellite imagery. *Nature communications*, 12(1):4392, 2021.
- 419 [12] Brian L Sullivan, Christopher L Wood, Marshall J Iliff, Rick E Bonney, Daniel Fink, and Steve  
420 Kelling. ebird: A citizen-based bird observation network in the biological sciences. *Biological  
421 conservation*, 142(10):2282–2292, 2009.
- 422 [13] Kevin Tang, Manohar Paluri, Li Fei-Fei, Rob Fergus, and Lubomir Bourdev. Improving image  
423 classification with location context. In *Proceedings of the IEEE international conference on  
424 computer vision*, pages 1008–1016, 2015.
- 425 [14] Grant Van Horn, Steve Branson, Ryan Farrell, Scott Haber, Jessie Barry, Panos Ipeirotis, Pietro  
426 Perona, and Serge Belongie. Building a bird recognition app and large scale dataset with  
427 citizen scientists: The fine print in fine-grained dataset collection. In *Proceedings of the IEEE  
428 conference on computer vision and pattern recognition*, pages 595–604, 2015.
- 429 [15] Grant Van Horn, Oisin Mac Aodha, Yang Song, Yin Cui, Chen Sun, Alex Shepard, Hartwig  
430 Adam, Pietro Perona, and Serge Belongie. The inaturalist species classification and detection  
431 dataset. In *Proceedings of the IEEE conference on computer vision and pattern recognition*,  
432 pages 8769–8778, 2018.
- 433 [16] Yahoo. Yahoo flickr creative commons 100m. [http://webscope.sandbox.yahoo.com/  
434 catalog.php?datatype=i&did=67](http://webscope.sandbox.yahoo.com/catalog.php?datatype=i&did=67). Accessed: 2024-06-03.

- 435 [17] Christopher Yeh, Chenlin Meng, Sherrie Wang, Anne Driscoll, Erik Rozi, Patrick Liu, Jihyeon  
436 Lee, Marshall Burke, David B. Lobell, and Stefano Ermon. SustainBench: Benchmarks  
437 for Monitoring the Sustainable Development Goals with Machine Learning. In *Thirty-fifth*  
438 *Conference on Neural Information Processing Systems Datasets and Benchmarks Track (Round*  
439 *2)*, 12 2021.
